# Supplementary material
Source: PubMed Central journal article supplement (PMC7769025)
Supplement: CJN.10140620SupplementaryData.pdf [file CJN.10140620SupplementaryData.pdf]

## **Supplemental Material**

Supplemental Table 1. Time Between Screening and Randomization Measurements

Supplemental Table 2. Serious Adverse Events during On- and Off-Treatment

Supplemental Figure 1. Distribution of eGFR at randomization in participants with randomization eGFR  $<30$  mL/min/1.73 m<sup>2</sup>.

**Supplemental Table 1. Time Between Screening and Randomization Measurements**

|                                                      | <b>Canagliflozin</b> | <b>Placebo</b> | <b>Total</b> |
|------------------------------------------------------|----------------------|----------------|--------------|
| All                                                  |                      |                |              |
| Participants, n                                      | 2201                 | 2199           | 4400         |
| <3 weeks, n (%)                                      | 161 (7)              | 161 (7)        | 322 (7)      |
| 3 to 8 weeks, n (%)                                  | 1959 (89)            | 1950 (89)      | 3909 (89)    |
| >8 weeks, n (%)                                      | 81 (4)               | 88 (4)         | 169 (4)      |
| Randomization eGFR <30<br>mL/min/1.73 m <sup>2</sup> |                      |                |              |
| Participants, n                                      | 84                   | 90             | 174          |
| <3 weeks, n (%)                                      | 4 (5)                | 3 (3)          | 7 (4)        |
| 3 to 8 weeks, n (%)                                  | 74 (88)              | 80 (89)        | 154 (89)     |
| >8 weeks, n (%)                                      | 6 (7)                | 7 (8)          | 13 (7)       |
| Randomization eGFR ≥30<br>mL/min/1.73 m <sup>2</sup> |                      |                |              |
| Participants, n                                      | 2117                 | 2109           | 4226         |
| <3 weeks, n (%)                                      | 157 (7)              | 158 (7)        | 315 (7)      |
| 3 to 8 weeks, n (%)                                  | 1885 (89)            | 1870 (89)      | 3755 (89)    |
| >8 weeks, n (%)                                      | 75 (4)               | 81 (4)         | 156 (4)      |

---

eGFR, estimated glomerular filtration rate.

**Supplemental Table 2. Serious Adverse Events during On- and Off-Treatment**

|                                                   | Patients who continued the drug                                            |               | Patients who discontinued the drug for reasons other than adverse event |              |
|---------------------------------------------------|----------------------------------------------------------------------------|---------------|-------------------------------------------------------------------------|--------------|
|                                                   | Canagliflozin                                                              | Placebo       | Canagliflozin                                                           | Placebo      |
|                                                   | <i>On-treatment (until post-30 days after the last date of study drug)</i> |               |                                                                         |              |
| <b>Patients with any SAE, n/N (%)</b>             |                                                                            |               |                                                                         |              |
| Randomization eGFR <30 mL/min/1.73 m <sup>2</sup> | 16/51 (31)                                                                 | 22/56 (39)    | 5/11 (45)                                                               | 8/17 (47)    |
| Randomization eGFR ≥30 mL/min/1.73 m <sup>2</sup> | 466/1605 (29)                                                              | 474/1483 (32) | 89/269 (33)                                                             | 115/356 (32) |
| <b>Patients with a SAE per 1000 patient-years</b> |                                                                            |               |                                                                         |              |
| Randomization eGFR <30 mL/min/1.73 m <sup>2</sup> | 119.6                                                                      | 152.6         | 294.9                                                                   | 325.0        |
| Randomization eGFR ≥30 mL/min/1.73 m <sup>2</sup> | 110.8                                                                      | 123.4         | 255.5                                                                   | 241.3        |
| <b>SAE episodes, n</b>                            |                                                                            |               |                                                                         |              |
| Randomization eGFR <30 mL/min/1.73 m <sup>2</sup> | 40                                                                         | 45            | 8                                                                       | 18           |
| Randomization eGFR ≥30 mL/min/1.73 m <sup>2</sup> | 875                                                                        | 936           | 185                                                                     | 272          |
| <b>Days to the last date of drug, mean (SD)</b>   |                                                                            |               |                                                                         |              |

|                                |         |         |         |         |
|--------------------------------|---------|---------|---------|---------|
| Randomization eGFR             | 957.9   | 940.2   | 563.0   | 528.8   |
| <30 mL/min/1.73 m <sup>2</sup> | (228.1) | (246.0) | (370.2) | (316.1) |
| Randomization eGFR             | 957.0   | 946.1   | 472.9   | 489.0   |
| ≥30 mL/min/1.73 m <sup>2</sup> | (236.3) | (235.5) | (313.8) | (313.3) |

***Off-treatment (after 30 days post the last date of study drug)***

**Patients with any SAE, n/N (%)**

|                                |                    |                    |             |           |
|--------------------------------|--------------------|--------------------|-------------|-----------|
| Randomization eGFR             | 2/51 (4)*          | 0                  | 3/11 (27)   | 4/17 (24) |
| <30 mL/min/1.73 m <sup>2</sup> |                    |                    |             |           |
| Randomization eGFR             | 10/1605            | 8/1483             | 59/269 (22) | 96/356    |
| ≥30 mL/min/1.73 m <sup>2</sup> | (0.6) <sup>†</sup> | (0.5) <sup>†</sup> |             | (27)      |

**Patients with a SAE per 1000 patient-years**

|                                |        |       |       |       |
|--------------------------------|--------|-------|-------|-------|
| Randomization eGFR             | 1002.1 | 0     | 259.7 | 189.0 |
| <30 mL/min/1.73 m <sup>2</sup> |        |       |       |       |
| Randomization eGFR             | 528.8  | 429.7 | 157.4 | 197.6 |
| ≥30 mL/min/1.73 m <sup>2</sup> |        |       |       |       |

**SAE episodes, n**

|                                |    |    |     |     |
|--------------------------------|----|----|-----|-----|
| Randomization eGFR             | 5  | 0  | 8   | 5   |
| <30 mL/min/1.73 m <sup>2</sup> |    |    |     |     |
| Randomization eGFR             | 28 | 12 | 180 | 266 |
| ≥30 mL/min/1.73 m <sup>2</sup> |    |    |     |     |

**Days after the last date of drug, mean**

**(SD)**

|                                |             |           |         |         |
|--------------------------------|-------------|-----------|---------|---------|
| Randomization eGFR             | 14.3 (45.1) | 3.8 (5.7) | 383.5   | 454.6   |
| <30 mL/min/1.73 m <sup>2</sup> |             |           | (312.5) | (308.1) |

|                                                   |            |            |           |           |
|---------------------------------------------------|------------|------------|-----------|-----------|
| Randomization eGFR                                | 4.3 (12.9) | 4.6 (16.5) | 508.9     | 498.5     |
| ≥30 mL/min/1.73 m <sup>2</sup>                    |            |            | (313.8)   | (338.4)   |
| <hr/>                                             |            |            |           |           |
| <b>Total (on- and off-treatment)</b>              |            |            |           |           |
| <b>Patients with any SAE, n/N (%)</b>             |            |            |           |           |
| Randomization eGFR <30                            | 17/51 (33) | 22/56      | 6/11 (55) | 9/17 (53) |
| mL/min/1.73 m <sup>2</sup>                        |            | (39)       |           |           |
| Randomization eGFR ≥30                            | 468/1605   | 476/1483   | 117/269   | 157/356   |
| mL/min/1.73 m <sup>2</sup>                        | (29)       | (32)       | (43)      | (44)      |
| <b>Patients with a SAE per 1000 patient-years</b> |            |            |           |           |
| Randomization eGFR <30                            | 125.4      | 152.2      | 210.7     | 196.8     |
| mL/min/1.73 m <sup>2</sup>                        |            |            |           |           |
| Randomization eGFR ≥30                            | 110.9      | 123.4      | 162.0     | 163.3     |
| mL/min/1.73 m <sup>2</sup>                        |            |            |           |           |
| <b>SAE episodes, n</b>                            |            |            |           |           |
| Randomization eGFR <30                            | 45         | 45         | 16        | 23        |
| mL/min/1.73 m <sup>2</sup>                        |            |            |           |           |
| Randomization eGFR ≥30                            | 903        | 948        | 366       | 539       |
| mL/min/1.73 m <sup>2</sup>                        |            |            |           |           |
| <b>Days during follow-up, mean (SD)</b>           |            |            |           |           |
| Randomization eGFR <30                            | 971.2      | 943.1      | 945.5     | 982.5     |
| mL/min/1.73 m <sup>2</sup>                        | (213.7)    | (246.8)    | (396.7)   | (215.5)   |
| Randomization eGFR ≥30                            | 960.3      | 949.7      | 980.8     | 986.5     |
| mL/min/1.73 m <sup>2</sup>                        | (235.1)    | (234.9)    | (259.1)   | (257.8)   |
| <hr/>                                             |            |            |           |           |

SAE, serious adverse event; eGFR, estimated glomerular filtration rate; SD, standard deviation.

\*2 patients with eGFR  $<30$  mL/min/1.73 m<sup>2</sup> in the canagliflozin arm stopped the drug due to a fatal SAE.

†10 and 8 patients with eGFR  $\geq 30$  mL/min/1.73 m<sup>2</sup> in the canagliflozin and placebo arms, respectively, stopped the drug due to a fatal SAE.

**Supplemental Figure 1. Distribution of eGFR at randomization in participants with randomization eGFR <30 mL/min/1.73 m<sup>2</sup>.**

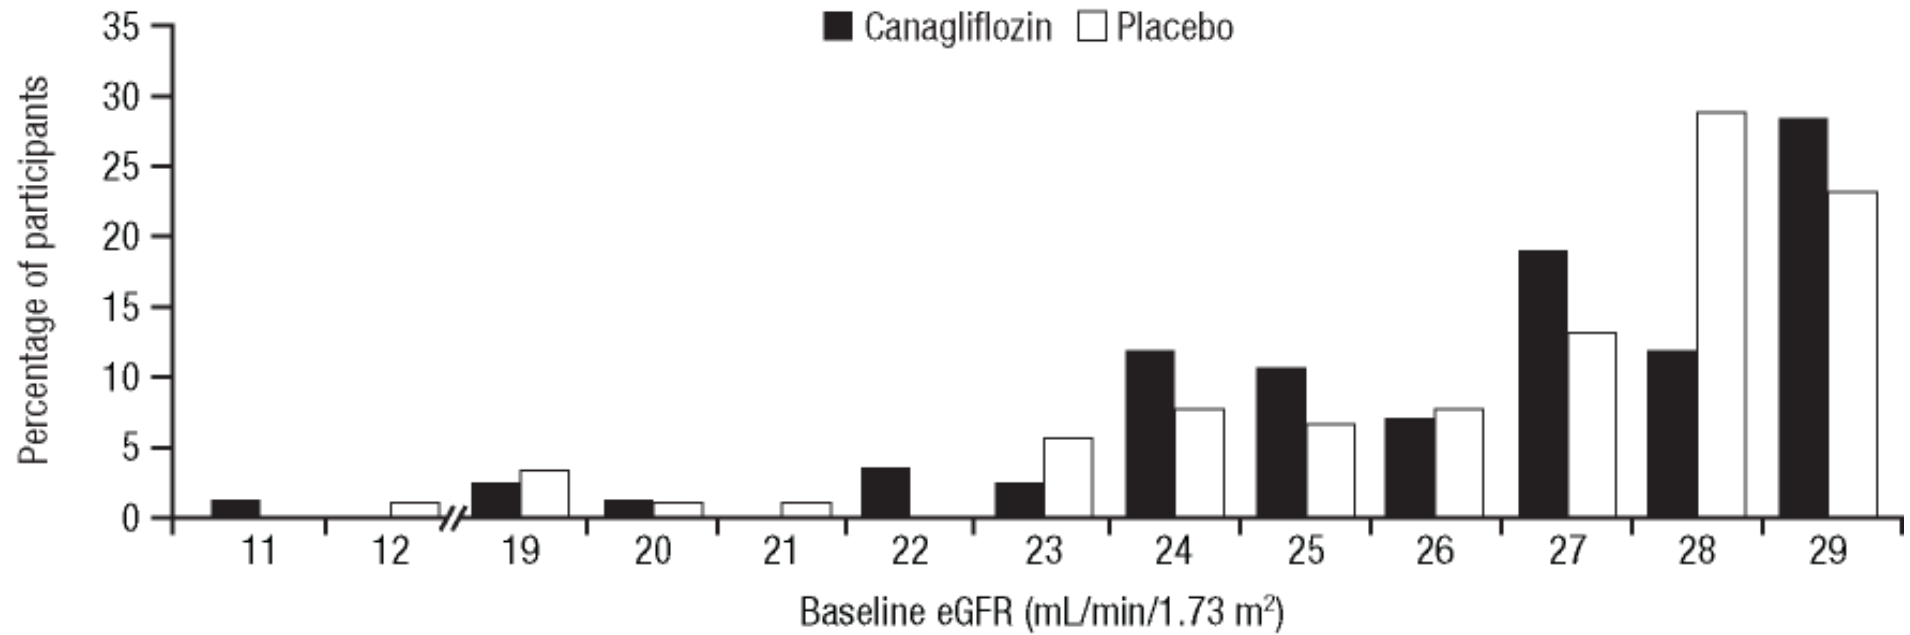

eGFR, estimated glomerular filtration rate.
